# Supplementary material for: Multiple-file vs. single-file endodontics in dental practice: a study in routine care
Source: PeerJ. 2016 Dec 7;4:e2765. doi: 10.7717/peerj.2765 (PMC5147020; doi:10.7717/peerj.2765)
Supplement: Data S1 — Raw data collected from the patient questionnaires and the P-Is applied for preparation of Figs. 1–4. [file peerj-04-2765-s001.xlsx]

## Sheet: Supplemental Data
PatientID	PI	Gender	Study group	VASbeforetreat	OHIPG14_Score_beforetreat	VASatcompletionoftreat	OHIPG14beforecompketionoftreat	DMFT	Tooth	singlevsmultivisit	PainreductionVAS	Treatmenttimepercanalinsec	ImprovementOHIP14	Ageofpatient	Instrumentsused
147	1	0	1	65	20	5	8	8	36	0	60	59	12	20	5
370	1	0	1	50	14	10	3	9	46	0	40	68.3333	11	21	5
460	1	1	1	10	2	0	1	9	26	0	10	83.6667	1	24	5
464	1	0	1	10	1	1	0	19	15	1	9	165	1	31	5
466	1	1	1	60	20	85	20	10	36	0	-25	103.333	0	39	5
458	1	0	1	75	20	5	0	12	27	1	70	140	20	40	5
160	1	1	1	10	2	0	3	11	17	1	10	62.3333	-1	41	5
459	1	0	1	3	0	15	1	15	24	0	-12	188	-1	43	5
189	1	0	1	65	17	5	0	3	15	1	60	210	17	43	5
156	1	1	1	5	2	45	10	11	36	1	-40	125	-8	45	5
425	1	0	1	60	21	20	9	13	36	1	40	79.3333	12	46	5
310	1	1	1	30	10	1	0	9	46	1	29	47.6667	10	47	5
15	1	1	1	89	13	1	0	20	47	1	88	114.667	13	48	5
264	1	0	1	#NULL!	27	5	7	24	44	0	#NULL!	80	20	48	5
256	1	0	1	54	20	5	2	13	47	1	49	36	18	49	5
447	1	0	1	38	7	6	2	14	46	1	32	107	5	51	5
457	1	1	1	0	0	0	0	17	16	0	0	1502.75	0	51	5
157	1	1	1	70	6	50	17	12	46	1	20	151.333	-11	58	5
441	1	1	1	25	11	5	5	11	21	0	20	27	6	58	5
187	1	0	1	50	25	5	2	28	33	1	45	114	23	60	5
421	1	0	1	70	6	40	1	23	23	0	30	106	5	61	5
465	1	1	1	5	2	0	1	21	15	1	5	49	1	61	5
98	1	0	1	0	20	20	12	23	27	1	-20	122.667	8	64	5
184	1	1	1	60	7	20	6	17	26	1	40	#NULL!	1	64	5
127	1	1	1	20	1	5	0	20	45	1	15	339	1	65	5
392	1	1	1	15	3	15	3	23	14	0	0	241	0	65	5
456	1	1	1	5	0	5	0	28	35	1	0	112	0	68	5
62	1	0	1	50	15	5	1	13	37	0	45	96.6667	14	83	5
390	1	#NULL!	0	25	1	56	9	16	27	1	-31	77.3333	-8	#NULL!	1
428	1	0	0	50	9	96	18	14	15	0	-46	307	-9	30	1
382	1	1	0	30	8	80	17	10	16	1	-50	166.5	-9	35	1
134	1	0	0	20	13	40	20	10	27	0	-20	116	-7	40	1
367	1	0	0	80	32	10	9	20	47	1	70	190	23	41	1
446	1	0	0	92	6	8	0	19	37	1	84	77.3333	6	41	1
233	1	0	0	46	7	10	1	7	26	1	36	203.333	6	43	1
220	1	0	0	50	15	0	0	12	47	0	50	239.333	15	44	1
377	1	1	0	50	2	78	2	5	45	0	-28	145	0	45	1
49	1	1	0	95	23	2	2	20	15	1	93	140.5	21	46	1
229	1	0	0	20	3	10	3	12	23	0	10	132	0	48	1
125	1	0	0	43	7	3	0	15	15	0	40	174	7	48	1
112	1	1	0	95	3	45	10	10	47	0	50	156.667	-7	49	1
451	1	0	0	56	18	0	0	14	47	0	56	147.667	18	49	1
153	1	1	0	65	27	6	2	10	35	0	59	135	25	51	1
209	1	1	0	75	31	0	4	16	25	1	75	272	27	54	1
381	1	1	0	5	0	5	0	22	22	1	0	203	0	54	1
238	1	1	0	0	2	2	7	7	37	1	-2	235.333	-5	55	1
117	1	1	0	75	26	55	24	23	24	0	20	112	2	56	1
95	1	1	0	65	14	10	1	13	17	1	55	164.333	13	56	1
110	1	0	0	13	3	26	13	16	37	1	-13	108.667	-10	63	1
438	1	0	0	95	30	10	5	25	11	0	85	395	25	71	1
324	1	1	0	69	5	10	0	17	36	1	59	256	5	74	1
449	1	0	0	90	3	0	1	21	23	0	90	340	2	75	1
172	1	1	0	6	3	5	2	20	16	0	1	150	1	75	1
295	1	1	0	45	11	15	1	13	24	0	30	122	10	76	1
199	1	0	0	65	9	5	0	22	13	0	60	375	9	76	1
58	1	0	0	50	2	23	4	20	26	1	27	239	-2	82	1
265	2	1	1	#NULL!	#NULL!	0	0	3	26	1	#NULL!	51.6667	#NULL!	#NULL!	5
498	2	0	1	95	37	0	0	17	12	1	95	72	37	#NULL!	5
249	2	1	1	25	10	0	2	0	21	0	25	30	8	21	5
499	2	1	1	85	0	0	0	0	36	1	85	49.3333	0	22	5
472	2	1	1	85	25	0	0	0	35	0	85	50	25	23	5
501	2	0	1	11	3	0	0	0	36	1	11	77.6667	3	24	5
251	2	0	1	50	19	0	0	0	26	0	50	59	19	26	5
435	2	0	1	70	24	5	4	0	36	1	65	#NULL!	20	28	5
510	2	1	1	70	24	0	6	1	16	0	70	147.333	18	29	5
260	2	0	1	60	23	0	1	2	37	0	60	58	22	31	5
259	2	0	1	60	23	0	1	2	36	0	60	43.3333	22	31	5
261	2	0	1	0	12	5	26	3	15	1	-5	90	-14	31	5
500	2	1	1	60	22	0	0	1	14	1	60	46.5	22	32	5
476	2	0	1	#NULL!	11	15	3	14	35	0	#NULL!	60	8	33	5
374	2	1	1	30	10	32	5	1	36	0	-2	92.3333	5	35	5
450	2	1	1	40	7	0	0	1	25	0	40	44	7	36	5
502	2	1	1	65	17	2	2	1	46	0	63	88.3333	15	37	5
12	2	0	1	90	23	19	5	1	37	0	71	75.6667	18	37	5
496	2	1	1	95	44	2	3	2	27	0	93	51.6667	41	39	5
495	2	1	1	95	44	2	3	2	26	0	93	43.3333	41	39	5
497	2	1	1	80	41	16	0	4	26	0	64	65	41	39	5
174	2	1	1	8	1	10	2	12	45	1	-2	74	-1	41	5
221	2	1	1	30	15	0	1	#NULL!	36	0	30	52.6667	14	41	5
432	2	0	1	50	12	80	5	0	36	1	-30	61	7	42	5
443	2	1	1	0	5	0	4	9	25	1	0	59	1	42	5
444	2	1	1	40	6	9	2	14	22	0	31	93	4	42	5
509	2	0	1	0	9	20	12	16	36	0	-20	53	-3	44	5
506	2	0	1	80	34	0	5	16	35	0	80	64	29	44	5
505	2	0	1	80	34	0	5	16	34	0	80	132	29	44	5
504	2	0	1	80	34	0	5	16	33	0	80	94	29	44	5
508	2	0	1	60	29	0	16	16	15	0	60	71	13	44	5
507	2	0	1	60	29	0	16	16	14	0	60	74.5	13	44	5
513	2	1	1	0	0	0	0	1	36	0	0	60	0	45	5
415	2	0	1	90	30	0	0	12	17	0	90	63.3333	30	45	5
486	2	0	1	90	43	2	1	11	27	1	88	55.3333	42	46	5
193	2	1	1	#NULL!	6	0	0	6	45	0	#NULL!	52	6	47	5
489	2	1	1	74	26	0	0	6	47	1	74	45	26	48	5
488	2	1	1	35	16	25	9	6	45	1	10	34	7	48	5
490	2	1	1	5	1	3	3	6	16	1	2	50	-2	48	5
391	2	1	1	10	14	0	0	18	46	0	10	83	14	49	5
60	2	1	1	14	6	10	0	12	45	0	4	51	6	49	5
59	2	1	1	16	11	4	4	12	44	0	12	29	7	49	5
281	2	0	1	35	15	5	1	5	16	0	30	226	14	49	5
211	2	1	1	24	17	0	0	10	46	1	24	32.6667	17	52	5
223	2	0	1	0	5	11	3	28	22	1	-11	89	2	53	5
225	2	1	1	40	22	0	0	3	36	0	40	55	22	54	5
224	2	1	1	40	24	10	5	3	15	1	30	75	19	54	5
491	2	1	1	20	10	0	0	3	26	1	20	68.6667	10	57	5
397	2	0	1	38	25	0	6	12	26	0	38	46.6667	19	58	5
492	2	0	1	89	33	5	0	7	47	0	84	64.3333	33	59	5
493	2	0	1	80	36	1	0	7	35	0	79	75	36	59	5
296	2	1	1	40	10	0	0	28	22	1	40	99	10	62	5
275	2	1	1	75	13	0	0	4	35	1	75	110	13	73	5
512	2	1	1	74	12	49	13	16	43	0	25	65	-1	75	5
8	2	0	1	5	3	4	3	21	23	1	1	71	0	79	5
190	2	0	1	85	15	0	0	12	16	1	85	66	15	79	5
191	2	0	0	90	29	0	0	8	34	0	90	179	29	#NULL!	2
483	2	1	0	99	29	1	0	6	26	0	98	158.667	29	#NULL!	2
206	2	0	0	5	20	#NULL!	#NULL!	15	13	1	#NULL!	242	#NULL!	#NULL!	2
274	2	0	0	80	10	50	2	1	26	0	30	174.333	8	18	2
473	2	0	0	84	9	#NULL!	#NULL!	6	25	0	#NULL!	206	#NULL!	27	2
423	2	0	0	14	5	#NULL!	#NULL!	0	17	1	#NULL!	180.333	#NULL!	29	2
462	2	1	0	0	1	#NULL!	#NULL!	0	46	1	#NULL!	188	#NULL!	30	2
263	2	0	0	80	33	0	0	5	27	0	80	141	33	30	2
262	2	0	0	80	33	0	0	5	26	0	80	147	33	30	2
461	2	1	0	40	8	0	0	0	22	0	40	192	8	30	2
475	2	0	0	#NULL!	0	#NULL!	#NULL!	14	13	0	#NULL!	221	#NULL!	32	2
247	2	0	0	40	30	9	6	0	26	0	31	195.667	24	33	2
474	2	1	0	0	1	#NULL!	#NULL!	10	21	0	#NULL!	30	#NULL!	39	2
463	2	0	0	0	2	#NULL!	#NULL!	13	36	0	#NULL!	126.75	#NULL!	42	2
479	2	1	0	10	5	#NULL!	#NULL!	0	27	0	#NULL!	120.333	#NULL!	42	2
485	2	1	0	1	0	#NULL!	#NULL!	2	26	0	#NULL!	104.333	#NULL!	42	2
482	2	1	0	74	14	0	0	7	15	1	74	210	14	43	2
200	2	1	0	75	13	74	10	4	35	0	1	214	3	44	2
426	2	1	0	0	14	0	0	1	35	0	0	175	14	44	2
468	2	1	0	90	11	#NULL!	#NULL!	0	47	0	#NULL!	195	#NULL!	46	2
452	2	1	0	80	16	0	2	2	26	0	80	107.333	14	46	2
453	2	1	0	75	6	0	0	2	17	0	75	136	6	46	2
467	2	1	0	90	11	#NULL!	#NULL!	0	16	0	#NULL!	146.667	#NULL!	46	2
245	2	1	0	60	28	10	18	13	37	0	50	136.667	10	47	2
455	2	1	0	0	0	1	2	2	15	0	-1	244	#NULL!	47	2
126	2	1	0	84	17	#NULL!	#NULL!	6	46	0	#NULL!	194.333	#NULL!	48	2
487	2	1	0	90	35	#NULL!	#NULL!	#NULL!	27	0	#NULL!	107	#NULL!	48	2
236	2	0	0	31	4	1	3	9	25	0	30	214	1	48	2
416	2	0	0	65	13	10	3	#NULL!	14	0	55	162	10	48	2
471	2	1	0	59	11	0	0	7	46	0	59	206	11	50	2
478	2	0	0	85	11	#NULL!	#NULL!	2	37	0	#NULL!	#NULL!	#NULL!	50	2
404	2	0	0	84	21	1	0	3	47	1	83	188	21	51	2
63	2	1	0	30	2	10	0	11	36	0	20	163	2	52	2
484	2	0	0	35	5	0	0	17	35	0	35	274	5	53	2
412	2	1	0	67	0	1	0	18	33	0	66	209	0	53	2
373	2	1	0	10	4	10	0	#NULL!	24	0	0	173	4	55	2
386	2	1	0	80	35	0	2	14	27	0	80	130.333	33	56	2
402	2	1	0	9	0	1	0	10	23	0	8	251	0	57	2
440	2	1	0	10	20	1	0	#NULL!	24	0	9	178	20	60	2
254	2	1	0	38	18	#NULL!	#NULL!	13	14	1	#NULL!	155	#NULL!	60	2
389	2	0	0	50	15	0	1	14	25	0	50	210	14	62	2
258	2	1	0	80	33	1	1	23	13	0	79	204	32	64	2
286	2	1	0	40	8	1	0	11	25	0	39	196	8	70	2
503	2	0	0	#NULL!	14	6	4	4	47	0	#NULL!	75.6667	10	73	2
406	2	1	0	15	3	5	0	23	23	0	10	222	3	79	2
106	3	1	1	20	6	5	0	18	16	0	15	36.6667	6	#NULL!	5
169	3	1	1	20	20	0	4	12	36	0	20	46.6667	16	33	5
434	3	0	1	0	1	#NULL!	#NULL!	10	38	1	#NULL!	55.3333	#NULL!	43	5
379	3	1	1	76	19	5	0	#NULL!	24	0	71	112.5	19	43	5
562	3	1	1	5	0	8	0	13	22	0	-3	32	0	44	5
132	3	0	1	53	15	10	2	15	17	0	43	137.5	13	45	5
2	3	0	1	92	29	9	5	13	47	0	83	62.6667	24	49	5
248	3	0	1	65	19	5	1	22	26	0	60	90	18	52	5
140	3	0	1	40	13	5	1	18	44	0	35	37	12	56	5
244	3	0	1	#NULL!	20	5	0	6	46	0	#NULL!	98	20	57	5
380	3	0	1	65	16	2	4	21	27	0	63	79	12	59	5
403	3	0	1	30	6	0	0	26	34	0	30	165	6	62	5
123	3	0	1	69	17	5	0	28	33	0	64	88	17	63	5
375	3	1	1	70	18	5	1	5	#NULL!	0	65	55.6667	17	63	5
531	3	0	1	75	4	5	0	14	13	0	70	50	4	64	5
241	3	0	1	90	19	1	0	9	44	0	89	210	19	68	5
433	3	0	1	#NULL!	4	5	5	24	13	0	#NULL!	180	-1	72	5
414	3	0	1	82	13	5	1	17	33	0	77	177	12	74	5
65	3	0	1	25	14	8	10	28	47	0	17	100	4	76	5
227	3	1	1	90	30	10	8	23	21	0	80	85	22	77	5
16	3	0	1	64	20	5	2	28	23	0	59	81	18	79	5
516	3	1	1	0	2	5	2	19	21	1	-5	70	0	83	5
161	3	0	1	0	1	5	1	24	12	1	-5	140	0	88	5
128	3	0	0	83	10	15	2	28	32	0	68	135	8	#NULL!	1
282	3	0	0	38	2	20	1	8	17	0	18	132.5	1	#NULL!	1
551	3	1	0	2	5	5	2	4	36	0	-3	131.667	3	19	1
481	3	1	0	40	13	1	0	10	36	0	39	110.667	13	25	1
135	3	1	0	27	12	#NULL!	#NULL!	0	36	0	#NULL!	100	#NULL!	25	1
532	3	0	0	78	34	0	0	19	21	0	78	181	34	28	1
546	3	1	0	16	2	5	0	8	26	0	11	120.75	2	29	1
544	3	0	0	70	30	10	5	12	11	0	60	150	25	29	1
522	3	0	0	79	37	30	14	13	16	0	49	113.333	23	38	1
529	3	0	0	40	24	15	1	7	46	0	25	70.5	23	42	1
167	3	0	0	85	21	5	3	17	24	0	80	97.5	18	43	1
168	3	1	0	75	9	15	2	14	15	1	60	83	7	45	1
240	3	0	0	70	30	10	11	14	26	0	60	77.3333	19	49	1
548	3	0	0	0	2	20	10	#NULL!	25	0	-20	165	-8	49	1
545	3	1	0	0	0	0	0	16	13	0	0	165	0	50	1
376	3	1	0	25	12	5	10	15	16	0	20	199.333	2	51	1
557	3	0	0	60	7	10	9	13	15	0	50	390	-2	51	1
195	3	0	0	20	5	5	0	0	14	0	15	142	5	51	1
226	3	0	0	80	41	9	11	7	26	0	71	130.5	30	52	1
554	3	1	0	50	24	10	1	15	16	0	40	126.333	23	55	1
378	3	1	0	5	5	3	2	28	33	0	2	68	3	58	1
553	3	0	0	#NULL!	12	#NULL!	3	16	34	0	#NULL!	186	9	62	1
550	3	0	0	12	#NULL!	0	0	20	14	0	12	208	#NULL!	63	1
413	3	0	0	10	12	5	3	20	37	0	5	190	9	64	1
552	3	0	0	85	12	5	0	26	34	0	80	214	12	66	1
405	3	0	0	#NULL!	10	2	6	#NULL!	22	0	#NULL!	122	4	68	1
250	3	1	0	#NULL!	11	10	1	24	42	0	#NULL!	85	10	71	1
278	3	0	0	5	21	1	21	28	33	0	4	103	0	78	1
166	3	1	0	85	15	0	0	8	34	0	85	165	15	81	1
518	3	0	0	47	6	#NULL!	6	28	33	0	#NULL!	140	0	82	1
542	4	0	1	72	8	0	2	4	22	0	72	43	6	19	5
568	4	1	1	80	25	9	12	11	16	0	71	45	13	33	5
564	4	1	1	41	20	5	6	9	46	0	36	76.6667	14	34	5
182	4	1	1	75	29	9	18	15	46	0	66	52.5	11	42	5
208	4	1	1	60	36	5	14	17	26	0	55	66	22	45	5
431	4	1	1	0	2	0	0	14	37	0	0	65	2	48	5
222	4	1	1	50	14	5	6	11	36	0	45	58.75	8	53	5
511	4	1	1	45	20	5	2	14	27	0	40	59	18	53	5
119	4	1	1	9	0	9	0	19	14	0	0	54	0	54	5
68	4	0	1	65	22	2	10	22	25	0	63	89	12	55	5
170	4	1	1	50	7	3	2	15	46	0	47	61.6667	5	56	5
266	4	1	1	35	13	35	10	16	22	0	0	178	3	59	5
113	4	1	1	70	31	0	0	14	27	0	70	61.25	31	60	5
101	4	0	1	90	13	0	5	13	45	0	90	66	8	61	5
368	4	0	1	5	2	0	0	22	23	0	5	55	2	67	5
121	4	#NULL!	1	60	15	5	0	15	26	0	55	66.3333	15	73	5
520	4	1	1	5	0	5	0	23	35	1	0	47	0	74	5
559	4	1	1	75	24	19	13	5	45	0	56	55	11	75	5
395	4	0	1	55	18	5	1	28	33	0	50	35	17	75	5
212	4	0	1	50	12	1	4	25	15	0	49	41	8	75	5
514	4	1	1	30	2	0	1	18	22	0	30	210	1	76	5
78	4	1	1	64	27	#NULL!	0	25	37	0	#NULL!	69	27	78	5
129	4	1	1	5	11	0	4	28	43	1	5	34	7	79	5
541	4	1	0	65	28	10	10	10	47	0	55	86.6667	18	21	1
547	4	0	0	40	12	9	4	12	25	0	31	100	8	23	1
411	4	1	0	10	2	0	1	14	16	0	10	84.3333	1	27	1
292	4	1	0	20	10	3	13	13	24	0	17	#NULL!	-3	37	1
436	4	0	0	85	20	0	0	7	27	0	85	99.5	20	38	1
70	4	0	0	75	24	0	0	16	14	0	75	102.5	24	38	1
515	4	1	0	59	5	0	0	12	47	0	59	87	5	39	1
549	4	0	0	25	9	0	3	22	37	0	25	92.3333	6	41	1
384	4	1	0	9	6	1	2	12	35	1	8	102	4	44	1
203	4	0	0	69	17	0	0	23	34	0	69	101	17	44	1
407	4	1	0	65	20	30	3	26	34	0	35	212	17	45	1
165	4	0	0	85	27	1	0	16	26	0	84	63.3333	27	45	1
400	4	1	0	0	0	1	0	12	14	0	-1	85	0	45	1
122	4	0	0	45	22	0	4	6	26	0	45	88.3333	18	48	1
120	4	0	0	0	2	0	3	17	24	0	0	64.5	-1	48	1
114	4	0	0	41	26	1	6	27	48	0	40	62.3333	20	52	1
176	4	0	0	44	3	#NULL!	7	21	14	0	#NULL!	81.5	-4	57	1
178	4	1	0	75	2	15	0	22	45	0	60	112	2	59	1
494	4	1	0	65	14	5	0	22	24	0	60	51	14	61	1
350	4	1	0	59	18	#NULL!	#NULL!	20	47	0	#NULL!	78	#NULL!	62	1
14	4	1	0	5	7	0	3	26	43	0	5	96	4	73	1
519	4	1	0	5	4	0	2	23	13	1	5	178	2	74	1
217	5	1	1	15	0	5	0	8	47	0	10	56.6667	0	#NULL!	5
175	5	1	1	40	2	#NULL!	#NULL!	20	36	0	#NULL!	146.333	#NULL!	#NULL!	5
410	5	0	1	5	4	#NULL!	#NULL!	24	33	0	#NULL!	149	#NULL!	#NULL!	5
573	5	0	1	85	35	15	8	0	17	0	70	67.75	27	#NULL!	5
163	5	1	1	0	1	0	1	18	17	0	0	186.333	0	#NULL!	5
589	5	#NULL!	1	40	2	75	15	28	14	0	-35	176.5	-13	#NULL!	5
585	5	0	1	#NULL!	#NULL!	70	13	1	36	0	#NULL!	82	#NULL!	23	5
584	5	1	1	70	29	0	1	0	36	0	70	100	28	24	5
587	5	0	1	5	1	0	2	4	47	0	5	100.5	-1	36	5
18	5	0	1	80	28	0	0	10	46	0	80	95	28	36	5
454	5	1	1	39	2	0	0	3	24	0	39	136	2	37	5
146	5	1	1	100	20	0	7	3	38	0	100	155	13	40	5
480	5	0	1	75	14	10	6	5	47	0	65	145	8	42	5
604	5	1	1	80	18	0	0	#NULL!	26	0	80	93.3333	18	43	5
318	5	1	1	5	6	0	0	4	37	0	5	70.3333	6	44	5
605	5	1	1	30	10	5	5	4	46	0	25	119.75	5	45	5
569	5	1	1	70	2	5	0	3	46	0	65	148	2	45	5
417	5	1	1	80	12	0	0	4	37	0	80	17	12	45	5
517	5	1	1	20	7	15	4	10	26	0	5	98.75	3	49	5
537	5	1	1	0	0	5	0	7	11	0	-5	128	0	49	5
528	5	1	1	60	15	45	15	5	27	0	15	132.667	0	50	5
72	5	1	1	68	21	0	0	#NULL!	#NULL!	0	68	#NULL!	21	50	5
45	5	1	1	65	11	2	0	6	47	0	63	209	11	51	5
210	5	0	1	90	25	85	17	18	44	0	5	364	8	51	5
419	5	1	1	80	18	0	0	10	18	0	80	205	18	52	5
257	5	1	1	90	24	0	0	6	17	0	90	111.5	24	52	5
576	5	0	1	80	23	0	0	17	32	1	80	310	23	54	5
586	5	1	1	0	1	0	0	#NULL!	16	0	0	190.667	1	54	5
17	5	1	1	80	17	#NULL!	#NULL!	6	47	0	#NULL!	119.667	#NULL!	58	5
131	5	1	1	25	1	#NULL!	#NULL!	10	46	0	#NULL!	99	#NULL!	60	5
606	5	1	1	10	10	5	8	1	17	0	5	215	2	60	5
74	5	0	1	75	38	#NULL!	#NULL!	7	37	0	#NULL!	91.3333	#NULL!	70	5
601	5	#NULL!	0	40	13	#NULL!	#NULL!	4	47	0	#NULL!	241	#NULL!	#NULL!	3
588	5	#NULL!	0	81	34	#NULL!	#NULL!	#NULL!	46	0	#NULL!	185.667	#NULL!	#NULL!	3
216	5	#NULL!	0	90	16	#NULL!	#NULL!	1	46	0	#NULL!	143.75	#NULL!	#NULL!	3
555	5	#NULL!	0	70	15	#NULL!	#NULL!	1	46	1	#NULL!	204.5	#NULL!	#NULL!	3
593	5	#NULL!	0	70	8	#NULL!	#NULL!	0	46	1	#NULL!	130	#NULL!	#NULL!	3
398	5	#NULL!	0	#NULL!	#NULL!	0	1	1	37	0	#NULL!	198.667	#NULL!	#NULL!	3
420	5	#NULL!	0	80	21	#NULL!	#NULL!	11	37	0	#NULL!	230.667	#NULL!	#NULL!	3
186	5	#NULL!	0	40	6	#NULL!	#NULL!	4	36	0	#NULL!	117.75	#NULL!	#NULL!	3
607	5	#NULL!	0	0	1	#NULL!	#NULL!	7	34	1	#NULL!	218	#NULL!	#NULL!	3
599	5	#NULL!	0	0	0	#NULL!	#NULL!	#NULL!	27	1	#NULL!	166.25	#NULL!	#NULL!	3
533	5	#NULL!	0	1	0	#NULL!	#NULL!	15	25	1	#NULL!	165	#NULL!	#NULL!	3
566	5	#NULL!	0	0	0	#NULL!	#NULL!	8	25	0	#NULL!	188.5	#NULL!	#NULL!	3
583	5	#NULL!	0	10	30	#NULL!	#NULL!	10	24	1	#NULL!	139.5	#NULL!	#NULL!	3
524	5	#NULL!	0	10	1	#NULL!	#NULL!	7	17	1	#NULL!	208.333	#NULL!	#NULL!	3
108	5	#NULL!	0	95	29	#NULL!	#NULL!	5	16	1	#NULL!	169	#NULL!	#NULL!	3
394	5	#NULL!	0	#NULL!	9	#NULL!	#NULL!	14	13	1	#NULL!	210	#NULL!	#NULL!	3
594	5	0	0	#NULL!	#NULL!	#NULL!	#NULL!	#NULL!	#NULL!	0	#NULL!	#NULL!	#NULL!	25	3
#NULL!	5	0	0	#NULL!	#NULL!	#NULL!	#NULL!	#NULL!	#NULL!	0	#NULL!	#NULL!	#NULL!	26	3
582	5	0	0	#NULL!	#NULL!	#NULL!	#NULL!	#NULL!	#NULL!	0	#NULL!	#NULL!	#NULL!	40	3
565	5	0	0	#NULL!	#NULL!	#NULL!	#NULL!	#NULL!	#NULL!	0	#NULL!	#NULL!	#NULL!	41	3
602	5	0	0	#NULL!	#NULL!	#NULL!	#NULL!	#NULL!	#NULL!	0	#NULL!	#NULL!	#NULL!	42	3
399	5	0	0	#NULL!	#NULL!	#NULL!	#NULL!	#NULL!	#NULL!	0	#NULL!	#NULL!	#NULL!	42	3
600	5	0	0	#NULL!	#NULL!	#NULL!	#NULL!	#NULL!	#NULL!	0	#NULL!	#NULL!	#NULL!	43	3
#NULL!	5	0	0	#NULL!	#NULL!	#NULL!	#NULL!	#NULL!	#NULL!	0	#NULL!	#NULL!	#NULL!	44	3
556	5	0	0	#NULL!	#NULL!	#NULL!	#NULL!	#NULL!	#NULL!	0	#NULL!	#NULL!	#NULL!	44	3
185	5	1	0	#NULL!	#NULL!	#NULL!	#NULL!	#NULL!	#NULL!	0	#NULL!	#NULL!	#NULL!	47	3
215	5	1	0	#NULL!	#NULL!	#NULL!	#NULL!	#NULL!	#NULL!	0	#NULL!	#NULL!	#NULL!	47	3
578	5	1	0	#NULL!	#NULL!	35	4	10	36	1	#NULL!	171.667	#NULL!	49	3
109	5	0	0	#NULL!	#NULL!	#NULL!	#NULL!	#NULL!	#NULL!	0	#NULL!	#NULL!	#NULL!	50	3
538	5	0	0	#NULL!	#NULL!	80	24	11	47	0	#NULL!	136	#NULL!	51	3
579	5	1	0	#NULL!	#NULL!	70	6	5	45	1	#NULL!	399	#NULL!	53	3
581	5	0	0	5	14	#NULL!	#NULL!	5	47	1	#NULL!	108.667	#NULL!	54	3
207	5	1	0	0	0	5	0	5	27	0	-5	146	0	57	3
560	5	0	0	#NULL!	#NULL!	10	0	17	26	0	#NULL!	124	#NULL!	66	3
525	5	1	0	#NULL!	#NULL!	#NULL!	#NULL!	#NULL!	#NULL!	0	#NULL!	#NULL!	#NULL!	70	3
#NULL!	5	1	0	#NULL!	#NULL!	#NULL!	#NULL!	#NULL!	#NULL!	0	#NULL!	#NULL!	#NULL!	71	3
448	5	0	0	#NULL!	#NULL!	40	9	8	36	0	#NULL!	165	#NULL!	72	3
393	5	1	0	#NULL!	#NULL!	#NULL!	#NULL!	#NULL!	#NULL!	0	#NULL!	#NULL!	#NULL!	85	3
83	6	0	1	50	24	#NULL!	#NULL!	8	37	0	#NULL!	28	#NULL!	#NULL!	5
90	6	#NULL!	1	74	26	70	30	3	27	0	4	28	-4	#NULL!	5
25	6	#NULL!	1	#NULL!	#NULL!	#NULL!	#NULL!	13	23	0	#NULL!	57	#NULL!	#NULL!	5
82	6	1	1	0	18	#NULL!	#NULL!	0	17	0	#NULL!	28	#NULL!	#NULL!	5
76	6	0	1	20	6	0	1	1	17	0	20	10	5	23	5
93	6	1	1	54	8	2	0	0	27	0	52	24	8	27	5
84	6	1	1	80	7	10	1	1	16	0	70	12.3333	6	28	5
91	6	0	1	85	22	0	3	0	47	0	85	23	19	34	5
96	6	1	1	49	15	#NULL!	#NULL!	11	45	1	#NULL!	25	#NULL!	35	5
99	6	0	1	10	4	0	0	11	45	0	10	48	4	42	5
97	6	1	1	50	8	0	0	15	44	0	50	28	8	56	5
88	6	1	1	9	10	2	6	28	43	0	7	72	4	59	5
87	6	0	1	1	5	5	0	15	43	0	-4	28	5	60	5
81	6	0	1	35	5	5	0	14	37	0	30	36.5	5	63	5
77	6	1	1	70	23	10	3	7	35	0	60	70	20	69	5
75	6	0	1	85	25	12	7	22	47	0	73	126.333	18	73	5
94	6	1	1	65	9	#NULL!	#NULL!	17	16	0	#NULL!	#NULL!	#NULL!	78	5
100	6	0	1	80	6	0	1	17	35	0	80	32	5	82	5
80	6	0	1	45	1	0	0	18	35	0	45	31	1	84	5
79	6	0	1	45	1	0	0	18	34	0	45	66	1	84	5
31	6	1	0	15	14	0	6	28	47	0	15	110	8	#NULL!	1
38	6	1	0	0	10	0	5	10	44	0	0	104	5	#NULL!	1
55	6	0	0	49	10	10	5	21	22	0	39	65	5	#NULL!	1
29	6	1	0	10	13	2	8	13	15	0	8	98	5	#NULL!	1
30	6	1	0	20	2	5	0	9	13	0	15	232	2	#NULL!	1
40	6	0	0	50	7	0	0	#NULL!	25	0	50	60	7	24	1
41	6	0	0	5	15	5	13	0	45	0	0	146	2	27	1
32	6	1	0	3	3	34	5	4	36	0	-31	129.75	-2	37	1
44	6	1	0	#NULL!	16	0	5	0	14	0	#NULL!	89.5	11	40	1
35	6	1	0	90	30	13	7	15	35	0	77	364	23	41	1
43	6	1	0	20	14	0	4	0	25	0	20	80	10	43	1
39	6	0	0	0	2	0	7	2	46	0	0	92.5	-5	44	1
48	6	1	0	35	18	13	12	14	48	0	22	117.667	6	46	1
51	6	1	0	10	5	10	5	10	26	0	0	157	0	46	1
37	6	0	0	70	10	60	12	5	14	0	10	105.5	-2	46	1
27	6	0	0	0	37	0	12	22	35	0	0	424	25	47	1
28	6	0	0	0	37	0	12	22	14	0	0	152.5	25	47	1
26	6	1	0	0	4	0	3	16	12	0	0	574	1	48	1
54	6	0	0	82	17	0	5	3	27	0	82	89.3333	12	49	1
20	6	1	0	55	14	4	2	1	26	0	51	160.667	12	55	1
52	6	0	0	0	0	0	0	16	23	0	0	29	0	56	1
53	6	0	0	0	0	0	0	16	22	0	0	53	0	56	1
11	6	1	0	0	0	#NULL!	#NULL!	14	12	0	#NULL!	135	#NULL!	60	1
89	6	1	0	0	0	0	0	14	35	0	0	144	0	62	1
22	6	0	0	10	3	10	0	16	46	0	0	179.333	3	72	1
50	6	1	0	90	11	0	0	22	34	0	90	111	11	77	1
197	7	0	1	90	35	0	33	1	26	0	90	3.33333	2	20	5
361	7	0	1	60	27	0	12	8	16	0	60	90	15	20	5
214	7	0	1	35	26	12	10	2	46	0	23	36.6667	16	21	5
272	7	0	1	68	2	70	5	1	16	0	-2	36.6667	-3	21	5
105	7	1	1	0	2	0	0	0	16	0	0	55	2	22	5
356	7	0	1	50	19	0	3	3	16	0	50	43.3333	16	23	5
290	7	0	1	60	21	59	16	#NULL!	15	0	1	27.5	5	23	5
24	7	1	1	50	13	10	8	1	36	1	40	14	5	25	5
345	7	1	1	0	12	0	9	11	22	1	0	45	3	25	5
344	7	1	1	0	12	0	9	11	21	1	0	30	3	25	5
341	7	1	1	0	20	0	19	10	14	0	0	35	1	25	5
343	7	1	1	0	8	0	3	11	12	1	0	35	5	25	5
346	7	1	1	5	2	0	1	4	36	0	5	35	1	26	5
337	7	1	1	100	32	0	30	#NULL!	26	1	100	35	2	26	5
371	7	0	1	70	29	70	28	0	25	1	0	45	1	26	5
357	7	1	1	18	3	0	0	0	35	0	18	45	3	27	5
329	7	1	1	70	23	0	22	2	37	0	70	5	1	28	5
9	7	1	1	70	21	75	16	1	36	0	-5	40	5	29	5
180	7	1	1	45	16	40	18	2	26	0	5	40	-2	30	5
366	7	1	1	60	35	1	34	13	23	0	59	90	1	30	5
311	7	1	1	30	8	0	4	6	44	1	30	45	4	31	5
255	7	0	1	0	1	69	11	2	36	0	-69	71.6667	-10	31	5
364	7	0	1	60	12	1	0	1	27	0	59	35	12	31	5
340	7	0	1	#NULL!	0	#NULL!	4	3	16	0	#NULL!	60	-4	31	5
306	7	0	1	50	18	0	2	0	35	0	50	45	16	32	5
267	7	1	1	90	14	5	0	16	33	0	85	45	14	32	5
124	7	1	1	2	0	1	0	1	21	0	1	45	0	32	5
277	7	0	1	0	0	1	0	0	47	0	-1	60	0	33	5
354	7	1	1	0	0	0	1	0	26	0	0	55	-1	33	5
280	7	1	1	10	7	69	7	2	36	0	-59	65	0	34	5
363	7	0	1	30	12	0	9	0	27	1	30	40	3	34	5
104	7	0	1	15	4	5	5	4	27	0	10	45	-1	34	5
279	7	0	1	3	2	0	1	6	45	1	3	90	1	35	5
330	7	0	1	75	13	0	9	2	26	1	75	35	4	35	5
57	7	0	1	45	33	0	17	3	27	1	45	43.3333	16	36	5
232	7	1	1	45	0	24	2	18	45	0	21	120	-2	38	5
321	7	0	1	29	16	1	9	7	22	1	28	50	7	39	5
73	7	1	1	18	2	0	0	9	25	1	18	#NULL!	2	40	5
268	7	0	1	#NULL!	13	0	1	9	46	0	#NULL!	55	12	42	5
111	7	1	1	70	4	0	10	0	27	0	70	113.333	-6	43	5
355	7	0	1	30	17	0	13	3	14	1	30	52.5	4	43	5
61	7	1	1	45	4	0	1	#NULL!	15	1	45	45	3	45	5
284	7	0	1	30	0	0	0	9	14	0	30	60	0	45	5
358	7	1	1	10	7	0	5	0	46	1	10	62.5	2	46	5
231	7	0	1	95	38	0	0	6	36	0	95	48.75	38	46	5
342	7	0	1	75	25	1	0	8	26	0	74	41.25	25	46	5
230	7	0	1	70	21	5	1	18	27	0	65	46.6667	20	47	5
351	7	0	1	0	0	55	5	1	17	0	-55	65	-5	47	5
331	7	1	1	25	10	1	5	2	47	1	24	50	5	48	5
271	7	1	1	15	7	0	5	3	27	0	15	80	2	48	5
118	7	1	1	15	28	2	4	9	11	0	13	35	24	48	5
360	7	0	1	10	12	0	2	21	45	0	10	90	10	49	5
338	7	1	1	0	7	0	5	10	44	1	0	45	2	49	5
164	7	1	1	0	15	0	10	1	25	1	0	120	5	49	5
339	7	1	1	100	27	0	18	10	24	0	100	130	9	49	5
365	7	0	1	70	15	0	0	0	12	1	70	#NULL!	15	49	5
348	7	0	1	0	0	0	0	0	27	1	0	55	0	51	5
332	7	0	1	100	31	10	12	0	14	0	90	30	19	52	5
325	7	1	1	1	4	0	3	28	33	1	1	60	1	53	5
359	7	0	1	0	0	0	0	16	23	1	0	60	0	53	5
369	7	1	1	80	0	0	0	6	17	0	80	45	0	53	5
307	7	0	1	15	7	5	7	17	34	0	10	60	0	54	5
353	7	0	1	0	3	0	0	6	44	0	0	60	3	55	5
298	7	1	1	30	6	10	1	7	23	0	20	60	5	55	5
285	7	1	1	30	0	0	0	4	16	0	30	65	0	55	5
86	7	0	1	70	0	0	0	22	34	1	70	40	0	56	5
85	7	0	1	70	0	0	0	22	33	1	70	35	0	56	5
362	7	0	1	20	0	10	2	0	45	0	10	120	-2	57	5
326	7	0	1	30	3	1	2	5	35	1	29	60	1	58	5
372	7	1	1	80	6	0	0	15	34	1	80	40	6	59	5
349	7	0	1	0	0	0	0	3	17	0	0	30	0	60	5
92	7	1	1	48	30	9	3	9	16	0	39	45	27	60	5
352	7	1	1	69	27	70	15	13	34	0	-1	45	12	61	5
107	7	0	1	65	30	10	2	14	23	0	55	90	28	61	5
194	7	0	1	90	36	0	36	21	44	0	90	60	0	62	5
143	7	1	1	55	13	0	4	13	26	0	55	35	9	62	5
201	7	0	1	85	25	5	6	18	34	0	80	110	19	64	5
144	7	0	1	50	13	1	11	17	27	0	49	65	2	64	5
141	7	1	1	50	10	0	8	13	17	1	50	#NULL!	2	64	5
142	7	1	1	50	10	0	8	13	16	1	50	#NULL!	2	64	5
155	7	1	1	60	2	0	0	25	12	0	60	65	2	65	5
335	7	0	1	15	2	90	8	16	45	0	-75	32.5	-6	66	5
333	7	0	1	20	16	2	11	25	43	0	18	45	5	66	5
152	7	1	1	80	7	10	5	28	33	0	70	60	2	68	5
148	7	1	1	100	15	8	14	26	44	0	92	35	1	69	5
149	7	1	1	100	15	8	14	26	43	0	92	35	1	69	5
334	7	1	1	70	17	0	15	1	36	0	70	37.5	2	70	5
336	7	1	1	89	22	1	1	22	48	0	88	#NULL!	21	74	5
276	7	1	1	70	13	1	12	#NULL!	33	0	69	120	1	74	5
204	7	1	1	0	3	0	0	28	21	1	0	30	3	74	5
205	7	1	1	0	3	0	0	28	12	1	0	30	3	74	5
115	7	0	1	60	3	60	3	20	44	0	0	40	0	76	5
347	7	1	1	79	5	0	3	7	14	1	79	45	2	76	5
287	7	0	1	42	26	0	0	16	13	0	42	45	26	76	5
213	7	0	1	30	7	0	0	23	13	0	30	60	7	77	5
304	7	1	0	#NULL!	#NULL!	#NULL!	#NULL!	1	27	1	#NULL!	270	#NULL!	#NULL!	4
242	7	#NULL!	0	90	37	0	0	#NULL!	22	0	90	300	37	#NULL!	4
294	7	#NULL!	0	36	3	10	0	#NULL!	12	1	26	300	3	#NULL!	4
177	7	0	0	80	26	0	0	3	15	0	80	210	26	19	4
299	7	1	0	70	10	0	7	2	12	0	70	180	3	21	4
269	7	1	0	65	21	0	4	0	46	0	65	345	17	22	4
289	7	0	0	10	16	0	0	1	46	1	10	280	16	24	4
179	7	1	0	60	18	0	0	2	16	0	60	620	18	29	4
305	7	0	0	5	11	0	0	1	36	1	5	390	11	31	4
34	7	0	0	65	16	0	0	0	25	0	65	300	16	31	4
303	7	1	0	77	13	0	0	0	14	1	77	240	13	31	4
198	7	1	0	20	5	0	2	1	17	1	20	360	3	32	4
145	7	0	0	53	15	1	4	9	45	0	52	360	11	34	4
56	7	0	0	50	14	1	0	4	37	0	49	1100	14	35	4
239	7	1	0	10	8	0	0	0	25	0	10	330	8	36	4
328	7	1	0	28	9	2	1	3	17	0	26	600	8	36	4
319	7	0	0	100	18	4	0	7	41	0	96	480	18	38	4
320	7	0	0	100	18	4	0	7	31	0	96	900	18	38	4
301	7	0	0	100	43	20	2	7	25	1	80	180	41	40	4
300	7	0	0	100	43	20	2	7	24	1	80	210	41	40	4
253	7	0	0	0	5	0	0	0	17	1	0	360	5	40	4
188	7	1	0	0	0	0	0	0	14	1	0	210	0	41	4
302	7	1	0	0	0	0	0	16	45	1	0	#NULL!	0	42	4
246	7	1	0	74	19	0	0	20	24	0	74	480	19	43	4
291	7	1	0	10	2	#NULL!	#NULL!	#NULL!	#NULL!	0	#NULL!	#NULL!	#NULL!	44	4
309	7	1	0	14	4	0	0	11	45	1	14	480	4	46	4
293	7	0	0	10	5	0	0	0	16	1	10	300	5	46	4
235	7	0	0	90	22	0	0	3	14	0	90	330	22	46	4
270	7	1	0	75	20	15	2	3	36	1	60	380	18	48	4
64	7	1	0	75	27	1	4	2	17	1	74	580	23	48	4
237	7	1	0	55	4	0	2	26	13	1	55	240	2	48	4
10	7	0	0	60	18	0	2	23	23	0	60	360	16	49	4
243	7	1	0	5	4	0	0	15	44	1	5	180	4	53	4
67	7	0	0	95	21	0	2	16	34	0	95	750	19	53	4
322	7	0	0	0	1	0	0	1	16	1	0	400	1	53	4
133	7	1	0	79	11	1	4	0	47	0	78	380	7	54	4
317	7	0	0	10	5	0	0	0	12	1	10	360	5	54	4
13	7	1	0	25	13	5	2	1	31	1	20	270	11	62	4
138	7	0	0	0	17	0	14	20	35	0	0	240	3	63	4
139	7	0	0	0	17	0	14	20	34	0	0	300	3	63	4
283	7	0	0	65	8	0	4	22	45	0	65	600	4	64	4
154	7	1	0	35	0	0	0	25	32	0	35	600	0	64	4
312	7	1	0	60	24	10	16	28	45	1	50	300	8	66	4
314	7	1	0	60	24	10	16	28	44	1	50	#NULL!	8	66	4
313	7	1	0	60	24	10	16	28	43	1	50	240	8	66	4
192	7	0	0	0	0	0	0	11	26	0	0	980	0	67	4
173	7	0	0	50	13	0	8	21	33	0	50	360	5	72	4
103	7	1	0	55	18	0	6	17	42	0	55	240	12	73	4
308	7	1	0	40	6	0	0	20	13	0	40	900	6	80	4
603	8	1	1	10	7	#NULL!	#NULL!	#NULL!	27	0	#NULL!	8.5	#NULL!	35	5
590	8	1	1	#NULL!	#NULL!	72	23	#NULL!	46	1	#NULL!	36	#NULL!	52	5
387	8	1	1	#NULL!	#NULL!	#NULL!	#NULL!	28	33	1	#NULL!	45	#NULL!	72	5
388	8	1	1	#NULL!	#NULL!	#NULL!	#NULL!	28	32	1	#NULL!	40	#NULL!	72	5
534	8	1	0	90	38	#NULL!	#NULL!	1	47	0	#NULL!	30	#NULL!	#NULL!	1
595	8	0	0	52	15	#NULL!	#NULL!	#NULL!	46	0	#NULL!	#NULL!	#NULL!	38	1
592	8	0	0	70	32	#NULL!	#NULL!	14	27	0	#NULL!	164.333	#NULL!	41	1
424	8	0	0	50	3	#NULL!	#NULL!	16	37	0	#NULL!	73.3333	#NULL!	43	1
598	8	1	0	10	0	#NULL!	#NULL!	#NULL!	25	0	#NULL!	50	#NULL!	47	1
577	8	1	0	20	0	#NULL!	#NULL!	28	23	0	#NULL!	40	#NULL!	52	1
597	8	0	0	#NULL!	#NULL!	80	22	16	36	0	#NULL!	80	#NULL!	55	1
202	8	1	0	#NULL!	#NULL!	15	3	21	17	1	#NULL!	#NULL!	#NULL!	56	1
580	8	0	0	70	22	#NULL!	#NULL!	25	14	0	#NULL!	37.5	#NULL!	57	1
575	8	0	0	30	11	#NULL!	#NULL!	20	36	0	#NULL!	50	#NULL!	59	1
591	8	1	0	22	6	#NULL!	#NULL!	11	44	0	#NULL!	90	#NULL!	64	1
323	8	1	0	#NULL!	#NULL!	0	7	22	23	1	#NULL!	60	#NULL!	75	1
71	8	0	0	80	27	#NULL!	#NULL!	27	34	0	#NULL!	60	#NULL!	81	1
596	8	1	0	30	3	#NULL!	#NULL!	1	41	0	#NULL!	50	#NULL!	84	1
136	8	1	0	#NULL!	#NULL!	50	6	3	37	0	#NULL!	#NULL!	#NULL!	84	1
429	9	0	1	#NULL!	0	4	0	#NULL!	15	0	#NULL!	29	0	#NULL!	5
574	9	0	1	90	22	0	0	#NULL!	16	0	90	89	22	19	5
430	9	1	1	#NULL!	39	0	17	#NULL!	24	0	#NULL!	92.5	22	20	5
567	9	0	1	0	4	0	0	8	35	0	0	142	4	38	5
530	9	0	1	0	3	0	0	#NULL!	34	0	0	84	3	39	5
561	9	1	1	65	2	0	0	8	27	0	65	91	2	42	5
572	9	1	1	1	4	0	2	#NULL!	24	0	1	174.5	2	45	5
539	9	0	1	0	1	0	0	#NULL!	27	0	0	190	1	46	5
521	9	0	1	0	0	0	0	#NULL!	27	0	0	158.667	0	48	5
540	9	1	1	5	6	0	0	8	47	0	5	96	6	52	5
535	9	1	1	0	0	0	0	12	34	0	0	402	0	53	5
47	9	0	1	10	0	0	0	8	17	0	10	95.75	0	54	5
558	9	1	1	0	0	0	0	25	31	0	0	173	0	56	5
181	9	1	1	0	0	7	0	4	46	0	-7	83.3333	0	61	5
228	9	0	1	20	4	0	1	22	13	0	20	56	3	63	5
396	9	0	1	5	8	12	0	6	25	0	-7	97	8	71	5
158	9	0	1	0	0	0	0	10	25	0	0	164	0	74	5
523	9	1	0	80	34	0	0	13	24	0	80	247	34	#NULL!	1
563	9	1	0	5	20	15	1	2	11	0	-10	130	19	24	1
527	9	0	0	0	0	0	0	2	25	0	0	185	0	32	1
477	9	0	0	3	2	10	3	#NULL!	45	0	-7	103	-1	35	1
543	9	1	0	0	0	0	0	10	34	0	0	389	0	50	1
570	9	0	0	1	0	4	0	#NULL!	38	0	-3	146.5	0	52	1
46	9	0	0	36	20	0	0	8	26	0	36	178	20	53	1
526	9	1	0	0	0	0	0	3	15	0	0	196.5	0	55	1
571	9	0	0	0	0	0	0	16	45	0	0	105	0	60	1
150	9	0	0	45	4	0	0	15	41	0	45	171	4	72	1
19	10	1	1	5	4	5	4	13	27	1	0	540	0	#NULL!	5
385	10	#NULL!	1	5	0	5	0	22	26	1	0	480	0	#NULL!	5
327	10	0	1	80	9	0	1	14	15	1	80	720	8	29	5
401	10	0	1	70	11	98	18	15	25	0	-28	480	-7	46	5
183	10	0	1	40	13	0	0	22	15	0	40	540	13	49	5
196	10	0	1	73	15	7	4	17	16	0	66	760	11	54	5
422	10	0	1	73	19	#NULL!	#NULL!	20	13	1	#NULL!	300	#NULL!	54	5
218	10	1	1	88	29	20	4	25	42	0	68	2040	25	58	5
252	10	1	1	20	3	10	3	28	25	0	10	690	0	58	5
297	10	1	1	70	18	0	0	22	37	1	70	760	18	60	5
219	10	1	1	85	13	55	13	12	26	1	30	600	0	60	5
162	10	1	1	7	11	7	8	28	12	1	0	480	3	61	5
102	10	0	1	85	17	84	2	21	48	0	1	500	15	70	5
408	10	1	1	0	0	0	0	28	13	1	0	120	0	70	5
439	10	0	1	50	12	50	15	18	25	0	0	750	-3	74	5
137	10	1	1	75	6	23	2	25	33	0	52	600	4	75	5
469	10	1	1	2	3	2	3	26	45	1	0	1140	0	77	5
470	10	1	1	2	3	2	3	26	21	1	0	1500	0	77	5
273	10	1	1	55	8	#NULL!	#NULL!	28	45	0	#NULL!	480	#NULL!	78	5
151	10	1	1	30	19	#NULL!	#NULL!	28	13	0	#NULL!	7200	#NULL!	79	5
171	10	1	1	86	13	7	5	28	37	1	79	460	8	40	5
442	10	1	0	#NULL!	#NULL!	78	1	20	46	1	#NULL!	375	#NULL!	#NULL!	1
116	10	#NULL!	0	50	5	30	0	28	27	0	20	750	5	#NULL!	1
130	10	#NULL!	0	84	13	14	4	24	17	0	70	800	9	#NULL!	1
437	10	0	0	0	3	0	2	6	16	1	0	700	1	29	1
418	10	0	0	60	19	50	10	10	27	0	10	900	9	36	1
409	10	1	0	54	9	62	1	13	15	0	-8	1080	8	46	1
445	10	1	0	15	6	#NULL!	#NULL!	16	11	1	#NULL!	900	#NULL!	55	1
69	10	1	0	20	11	10	8	26	46	1	10	690	3	56	1
66	10	0	0	65	25	55	11	24	46	0	10	800	14	58	1
288	10	0	0	40	18	#NULL!	#NULL!	19	26	0	#NULL!	900	#NULL!	61	1
159	10	0	0	4	1	5	1	16	15	0	-1	#NULL!	0	64	1
383	10	1	0	49	9	20	2	23	36	1	29	680	7	66	1
234	10	1	0	24	11	5	0	8	17	1	19	560	11	69	1
316	10	1	0	25	6	0	0	19	27	1	25	720	6	71	1
42	10	0	0	36	6	5	3	21	47	1	31	820	3	72	1
315	10	1	0	21	3	0	3	27	13	1	21	600	0	72	1
427	10	1	0	1	0	0	0	22	11	1	1	900	0	76	1
